# Supplementary material for: Imipramine Accelerates Nonalcoholic Fatty Liver Disease, Renal Impairment, Diabetic Retinopathy, Insulin Resistance, and Urinary Chromium Loss in Obese Mice
Source: MDPI journal article supplement (doi:10.3390/vetsci8090189), 2021-09-09
Supplement: s1 [file s1]

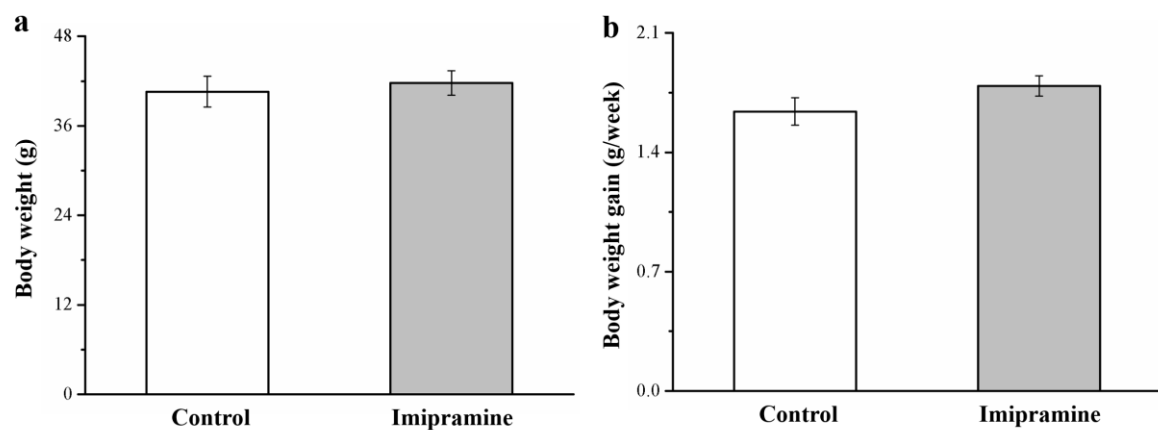

**Figure S1.** Effect of imipramine (5 mg/kg every day) on (a) body weight and (b) weekly body weight gain in HFD-fed controls and HFD-fed mice treated with imipramine during the 56-day experimental period. No significant differences in body weight and weekly body weight gain were observed between the two groups.

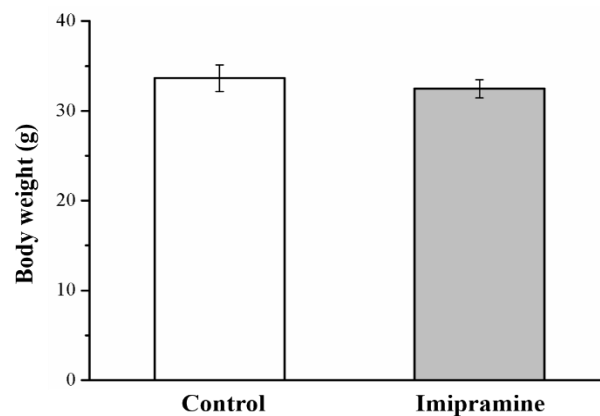

**Figure S2.** Effect of imipramine (10 mg/kg every day) on body weight in SD-fed controls and SD-fed mice treated with imipramine during the 56-day experimental period. No significant differences in body weight were observed between the two groups.

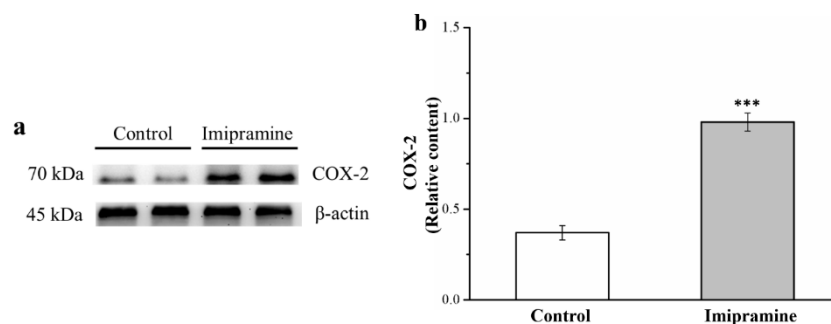

**Figure S3.** Effects of imipramine (10 mg/kg every day) on (a) a representative image showing blots of liver extracts. The expression level of (b) COX-2 was measured. Data are in the form of mean  $\pm$  standard deviation ( $n = 8$ ). \*\*\* $p < 0.001$ .

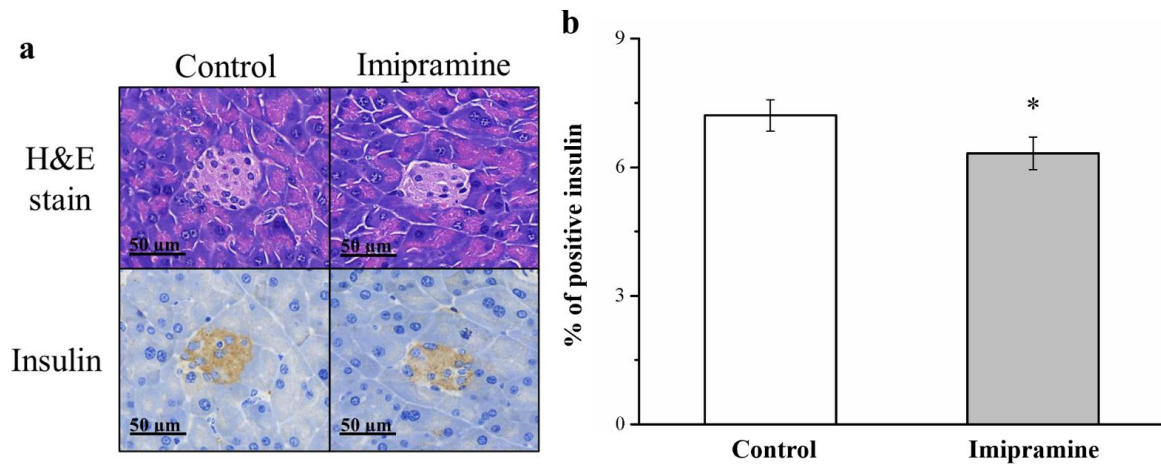

**Figure S4.** Alterations in (a) islet morphologies (hematoxylin and eosin as well as immunohistochemical stain; 200× magnification) and (b)  $\beta$ -cell percentage in control and treatment groups. \* $p < 0.05$ .

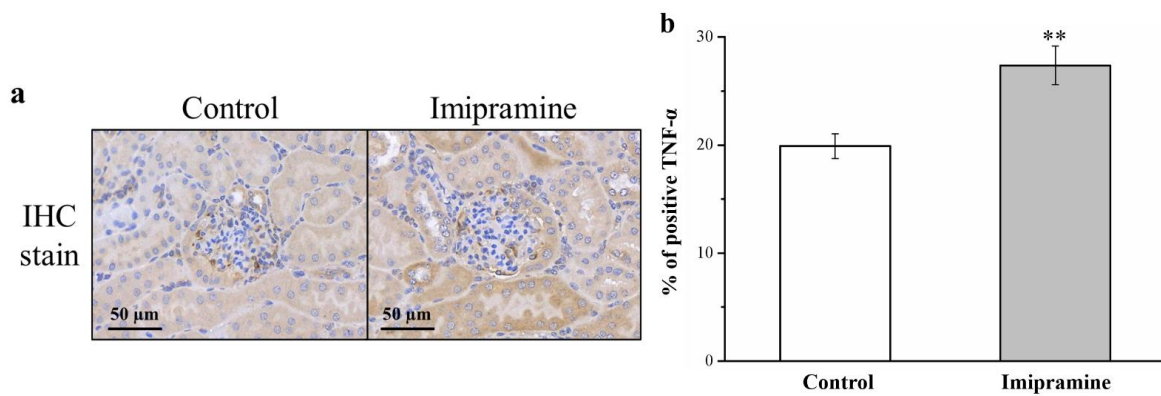

**Figure S5.** Alterations in (a) IHC stains (magnification: 200×) and (b) renal levels of TNF- $\alpha$  in treatment and control groups. \*\* $p < 0.01$ .

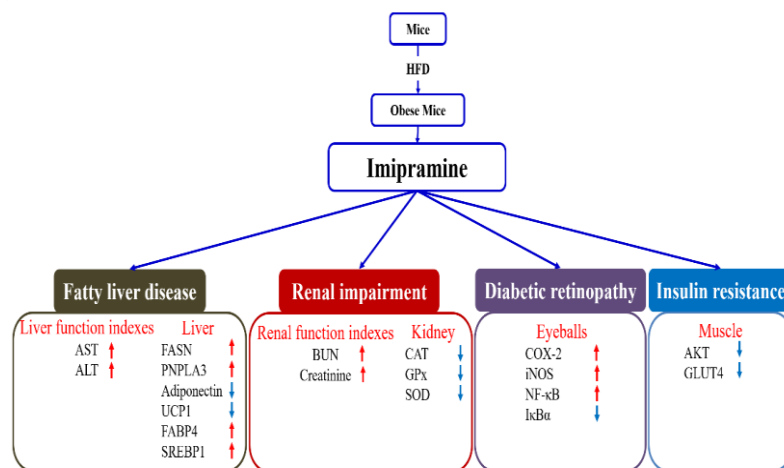

**Figure S6.** Mechanistic presentation of side effects experienced by HFD-induced obese mice treated with imipramine for 56 days.
